# Supplementary material for: Integrated in silico and experimental methods revealed that Arctigenin inhibited angiogenesis and HCT116 cell migration and invasion through regulating the H1F4A and Wnt/β-catenin pathway
Source: Royal Society of Chemistry journal article supplement (doi:10.1039/c5mb00439j), 2015-08-04
Supplement: c5mb00439j1.pdf [file c5mb00439j1.pdf]

**Table.1. Protein spots were identified by ESI-Q-TOF**

| <b>Spot No.</b> | <b>Accession No.</b> | <b>Protein Name</b>                                              | <b>Gene Name</b> | <b>Theoretical Mr</b> | <b>Theoretical pI</b> |
|-----------------|----------------------|------------------------------------------------------------------|------------------|-----------------------|-----------------------|
| M 1             | P04083               | Annexin-1                                                        | ANXA1            | 38558.94              | 6.64                  |
| M 2             | P07900               | Heat shock protein HSP 90-alpha                                  | HSP90AA<br>1     | 84475.64              | 4.94                  |
| M 3             | P68363               | Tubulin alpha-1B chain                                           | TUBA1B           | 50119.60              | 4.94                  |
| M 4             | P08670               | Vimentin                                                         | VIM              | 53488.04              | 5.05                  |
| M 5             | O95433               | Activator of 90 kDa heat shock protein ATPase homolog 1          | AHSA1            | 38119.21              | 5.41                  |
| M 6             | P50395               | Rab GDP dissociation inhibitor beta                              | GDI2             | 50630.88              | 6.10                  |
| M 7             | P52565               | Rho GDP-dissociation inhibitor 1                                 | ARHGDI1          | 23061.66              | 5.01                  |
| M 8             | Q9UJZ1               | Stomatin-like protein 2, mitochondrial                           | STOML2           | 35666.54              | 5.37                  |
| M 9             | P62136               | Serine/threonine-protein phosphatase PP1-alpha catalytic subunit | PPP1CA           | 37356.76              | 5.94                  |
| M10             | P40925               | Malate dehydrogenase, cytoplasmic                                | MDH1             | 36271.98              | 6.89                  |
| M11             | P12004               | Proliferating cell nuclear antigen                               | PCNA             | 28750.29              | 4.57                  |
| M12             | P63208               | S-phase kinase-associated protein1                               | SKP1             | 18515.20              | 4.40                  |

| <b>Spot No.</b> | <b>Accession No.</b> | <b>Protein Name</b>                                                            | <b>Gene Name</b> | <b>Theoretical Mr</b> | <b>Theoretical pI</b> |
|-----------------|----------------------|--------------------------------------------------------------------------------|------------------|-----------------------|-----------------------|
| M13             | Q6XQN6               | Nicotinate phosphoribosyltransferase                                           | NAPRT1           | 57542.02              | 5.51                  |
| M14             | Q9Y2M0               | Fanconi-associated nuclease 1                                                  | FAN1             | 114152.00             | 7.10                  |
| M15             | P08559               | Pyruvate dehydrogenase E1 component subunit alpha, somatic form, mitochondrial | PDHA1            | 40055.82              | 6.51                  |
| M16             | Q09028               | Histone-binding protein RBBP4                                                  | RBBP4            | 47495.03              | 4.74                  |
| M17             | P33993               | DNA replication licensing factor MCM7                                          | MCM7             | 81125.53              | 6.09                  |
| M18             | P30086               | Phosphatidylethanolamine-binding protein 1                                     | PEBP1            | 20912.63              | 7.43                  |
| M19             | P25789               | Proteasome subunit alpha type-4                                                | PSMA4            | 21351.08              | 8.53                  |
| M20             | Q07021               | Complement component 1 Q subcomponent-binding protein, mitochondrial           | C1QBP            | 23768.56              | 4.32                  |
| M21             | Q9Y4G8               | Rap guanine nucleotide exchange factor 2                                       | RAPGEF2          | 167312.53             | 6.21                  |
| M22             | P07195               | L-lactate dehydrogenase B chain                                                | LDHB             | 36484.10              | 5.72                  |
| M23             | Q06323               | Proteasome activator complex subunit 1                                         | PSME1            | 28705.01              | 5.78                  |
| M24             | Q7L4N0               | F-actin-capping protein subunit beta Ezrin                                     | CAPZB            | 31199.73              | 5.36                  |
| M25             | P15311               |                                                                                | EZR              | 69238.70              | 5.95                  |

| <b>Spot No.</b> | <b>Accession No.</b> | <b>Protein Name</b>                                      | <b>Gene Name</b> | <b>Theoretical Mr</b> | <b>Theoretical pI</b> |
|-----------------|----------------------|----------------------------------------------------------|------------------|-----------------------|-----------------------|
| M26             | O95479               | GDH/6PGL endoplasmic bifunctional protein                | H6PD             | 86761.38              | 6.86                  |
| M27             | P25786               | Proteasome subunit alpha type-1                          | PSMA1            | 30220.29              | 6.51                  |
| M28             | Q15365               | Poly(rC)-binding protein 1                               | PCBP1            | 37473.94              | 6.66                  |
| M29             | Q14019               | Coactosin-like protein                                   | COTL1            | 15803.99              | 5.51                  |
| M30             | Q16658               | Fascin                                                   | FSCN1            | 54365.01              | 6.81                  |
| M31             | P45974               | Ubiquitin carboxyl-terminal hydrolase 5                  | USP5             | 95594.29              | 4.91                  |
| M32             | Q9NQR1               | N-lysine methyltransferase SETD8                         | SETD8            | 42863.02              | 9.69                  |
| M33             | Q6W4X9               | Mucin-6                                                  | MUC6             | 254585.91             | 7.16                  |
| M34             | P35052               | Glypican-1                                               | GPC1             | 56042.97              | 6.08                  |
| M35             | P63244               | Guanine nucleotide-binding protein subunit beta-2-like 1 | GNB2L1           | 35054.56              | 7.60                  |
| M36             | P23528               | Cofilin-1                                                | CFL1             | 18359.62              | 8.26                  |
| M37             | P07355               | Annexin A2                                               | ANXA2            | 38448.77              | 7.56                  |
| M38             | P08758               | Annexin A5                                               | ANXA5            | 35783.36              | 4.93                  |
| M39             | Q99996               | A-kinase anchor protein 9                                | AKAP9            | 453387.11             | 4.95                  |
| M40             | Q9UEW8               | STE20/SPS1-related proline-alanine-rich protein kinase   | STK39            | 59436.49              | 5.92                  |
| M41             | P62937               | Peptidyl-prolyl cis-trans isomerase A                    | PPIA             | 18000.88              | 7.68                  |

---

| <b>Spot No.</b> | <b>Accession No.</b> | <b>Protein Name</b>                                   | <b>Gene Name</b> | <b>Theoretical Mr</b> | <b>Theoretical pI</b> |
|-----------------|----------------------|-------------------------------------------------------|------------------|-----------------------|-----------------------|
| M42             | P60660               | Myosin light polypeptide 6                            | MYL6             | 16788.09              | 4.56                  |
| M43             | P63104               | 14-3-3 protein zeta/delta                             | YWHAZ            | 27727.73              | 4.73                  |
| M44             | Q14847               | LIM and SH3 domain protein 1                          | LASP1            | 29698.22              | 6.61                  |
| M45             | Q5S007               | Leucine-rich repeat serine/threonine-protein kinase 2 | LRRK2            | 285918.95             | 6.35                  |
| M46             | P16949               | Stathmin                                              | STMN1            | 17160.91              | 5.76                  |
| M47             | Q9UL46               | Proteasome activator complex subunit 2                | PSME2            | 27253.27              | 5.54                  |
| M48             | Q13148               | TAR DNA-binding protein 43                            | TARDBP           | 44711.31              | 5.85                  |
| M49             | P29375               | Lysine-specific demethylase 5A                        | RBP2             | 191971.89             | 6.12                  |
| M50             | Q15019               | Septin-2                                              | SEPT2            | 41461.25              | 6.15                  |

---
